# Supplementary material for: Manadoperoxides, a new class of potent antitrypanosomal agents of marine origin
Source: Royal Society of Chemistry journal article supplement (doi:10.1039/c2ob26124c), 2012-01-01
Supplement: c2ob26124c.pdf [file c2ob26124c.pdf]

## ELECTRONIC SUPPLEMENTARY INFORMATION

# Manadoperoxides, a New Class of Potent Antitrypanosomal Agents of Marine Origin

*Giuseppina Chianese, Ernesto Fattorusso, Fernando Scala, Roberta Teta,  
Barbara Calcinai, Giorgio Bavestrello, Henny A. Dien,  
Deniz Tasdemir, Orazio Taglialatela-Scafati\**

**Contents:** Copies of  $^1\text{H}$  and 2D NMR spectra for the new manadoperoxides  
E-K and peroxyplakoric ester C.  
Lowest energy conformation of manadoperoxide B

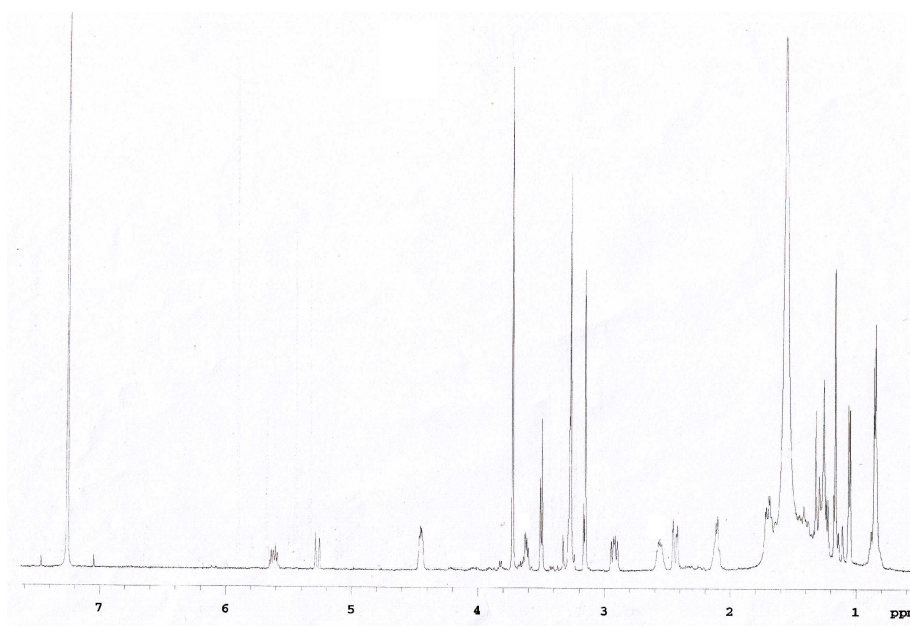

<sup>1</sup>H NMR spectrum (CDCl<sub>3</sub>) of manadoperoxide F (**8**)

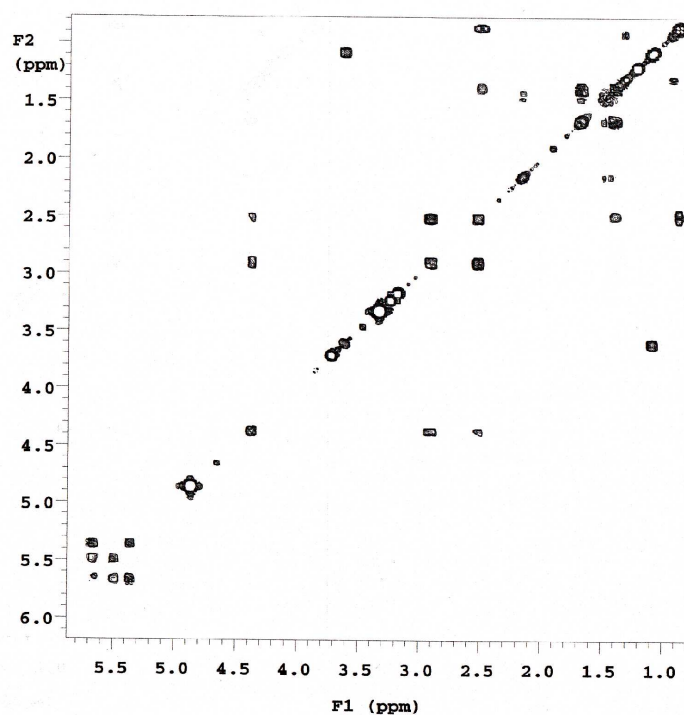

2D COSY NMR spectrum (CDCl<sub>3</sub>) of manadoperoxide F (**8**)

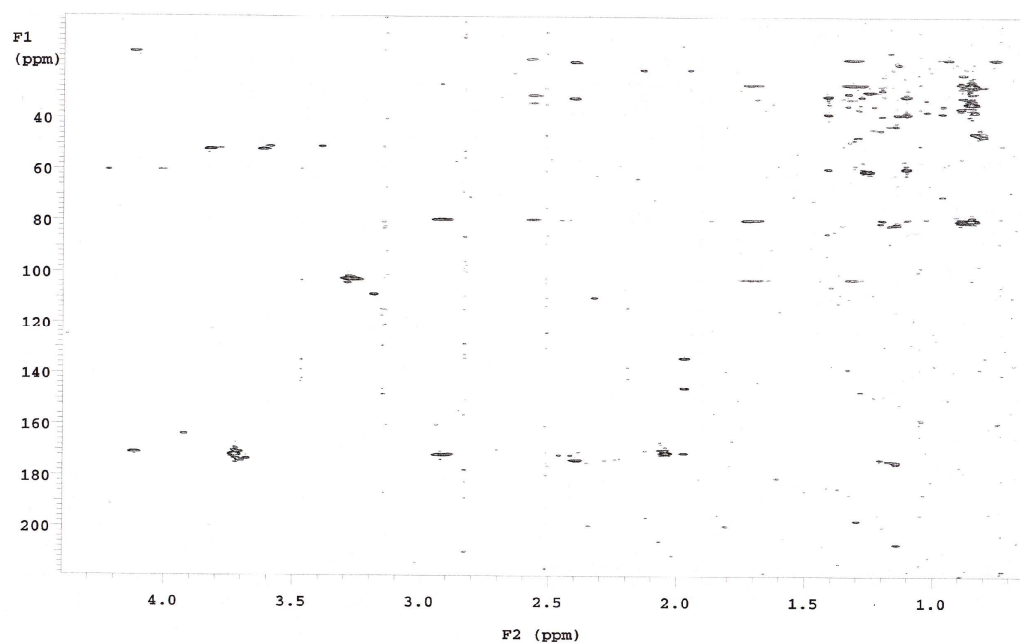

2D HMBC NMR spectrum ( $\text{CDCl}_3$ ) of manadoperoxide F (**8**)

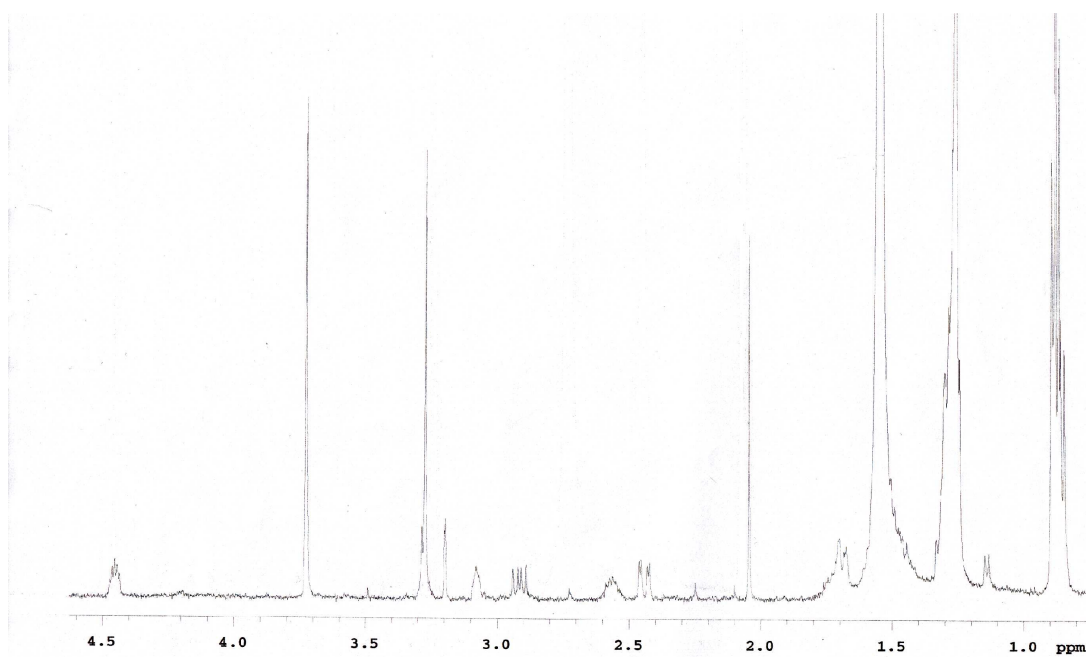

$^1\text{H}$  NMR spectrum ( $\text{CDCl}_3$ ) of manadoperoxide G (**9**)

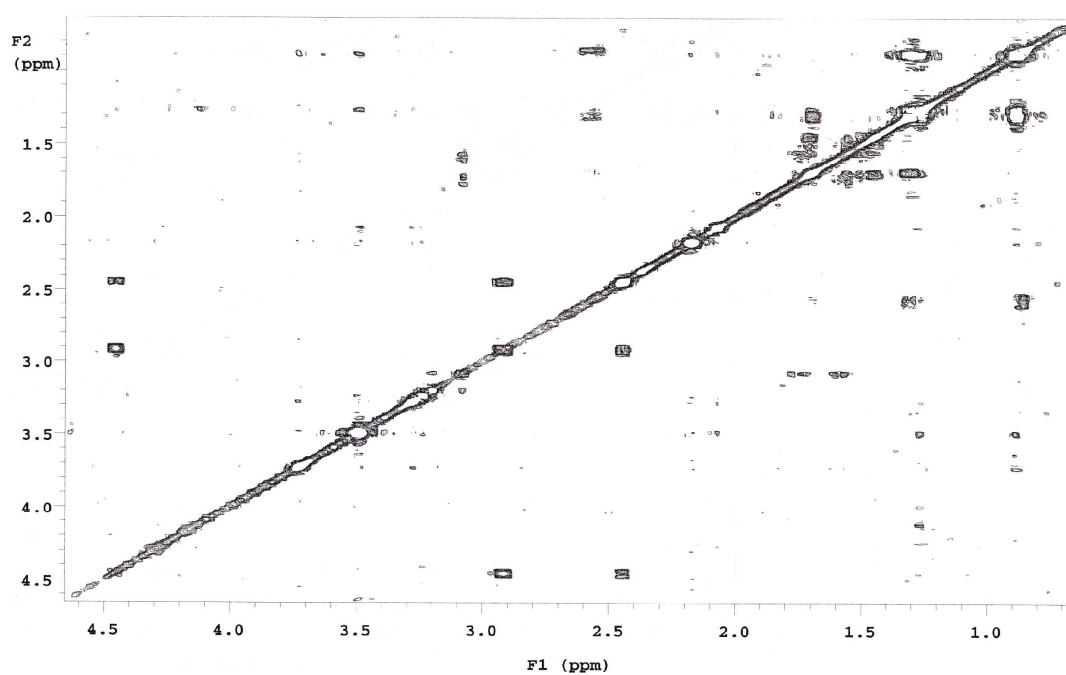

2D COSY NMR spectrum ( $\text{CDCl}_3$ ) of manadoperoxide G (**9**)

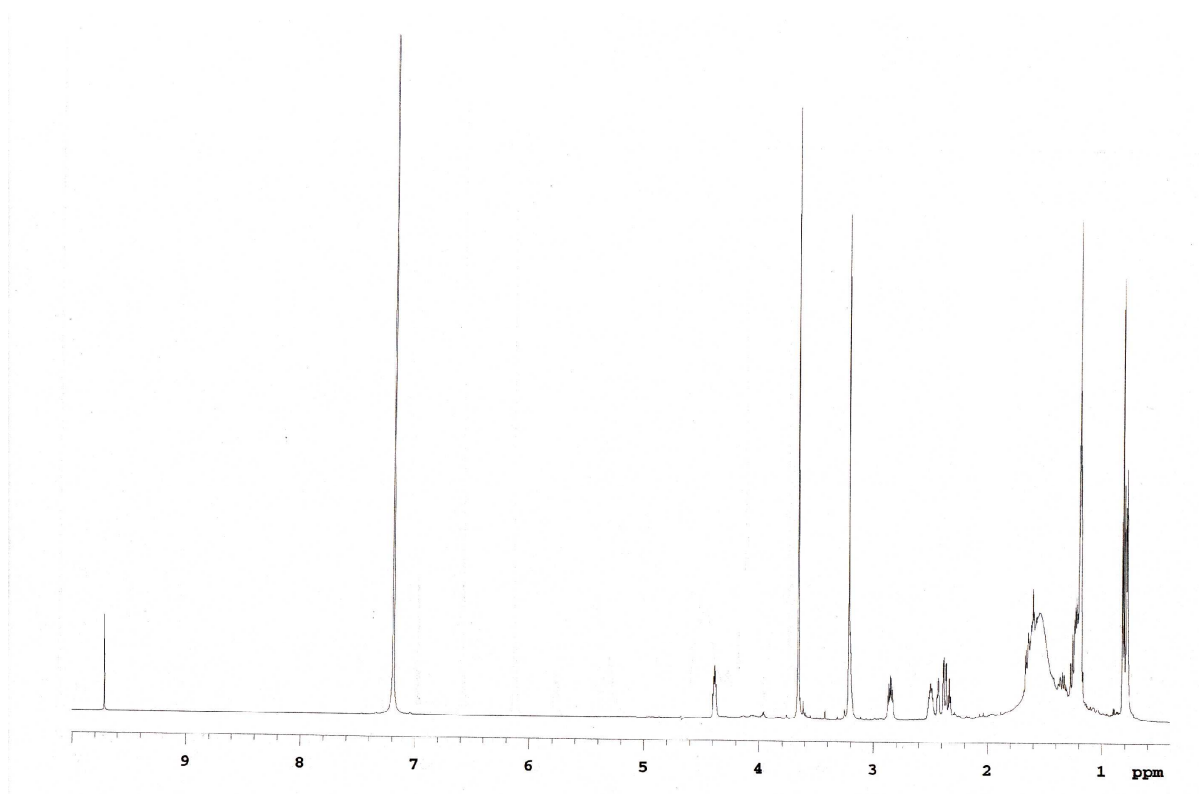

$^1\text{H}$  NMR spectrum ( $\text{CDCl}_3$ ) of manadoperoxide H (**10**)

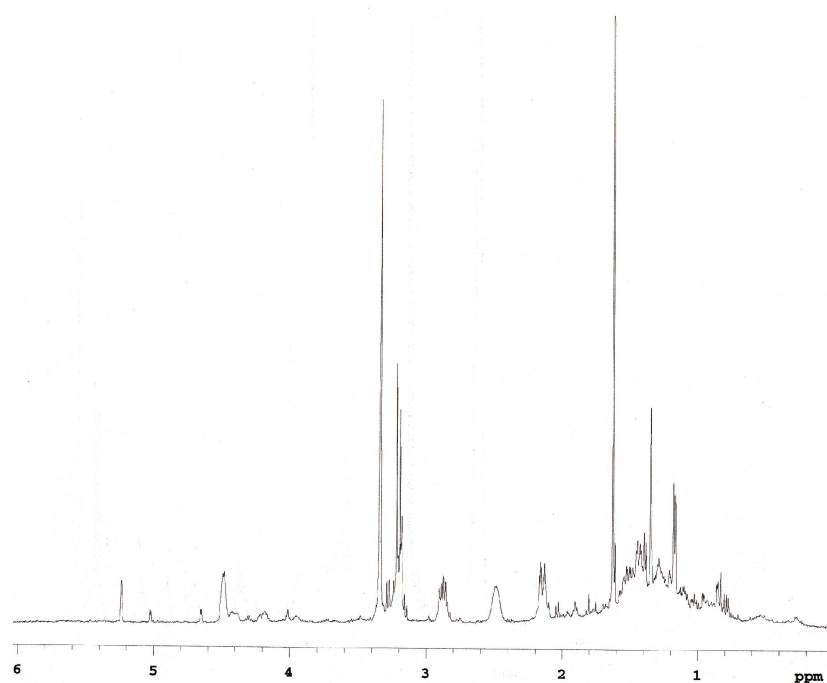

$^1\text{H}$  NMR spectrum ( $\text{C}_6\text{D}_6$ ) of manadoperoxide I (**11**)

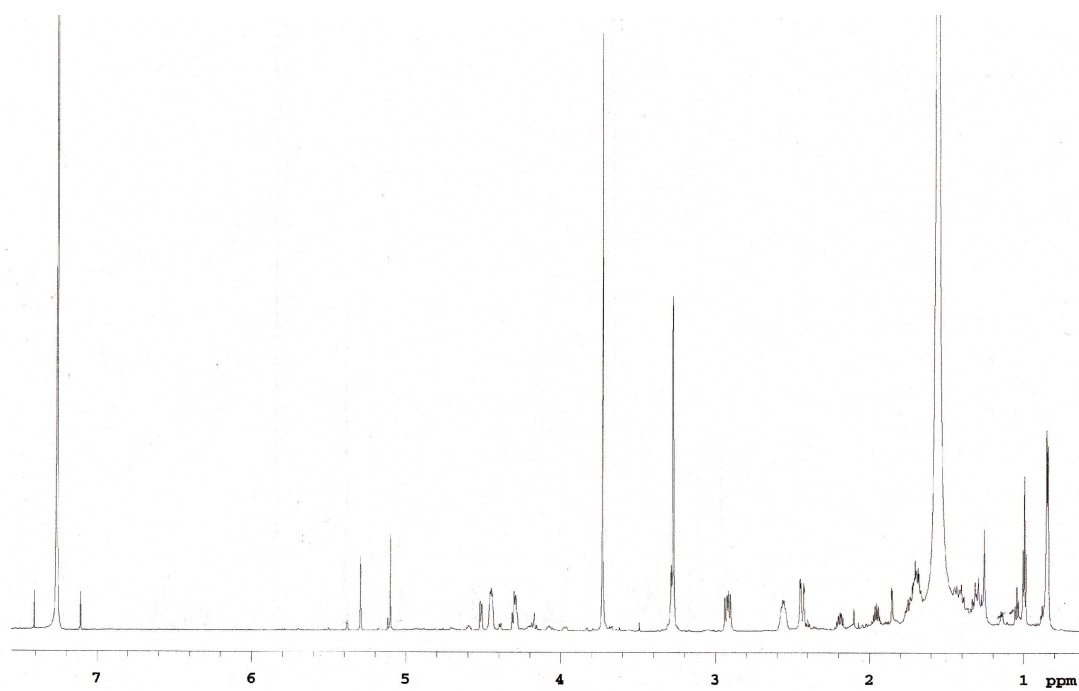

<sup>1</sup>H NMR spectrum (CDCl<sub>3</sub>) of manadoperoxide J (12)

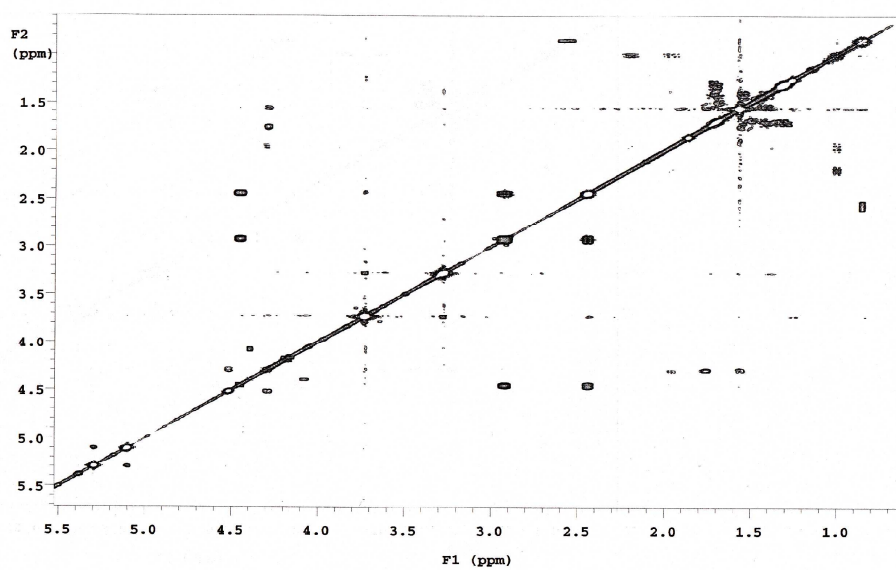

2D COSY NMR spectrum (CDCl<sub>3</sub>) of manadoperoxide J (12)

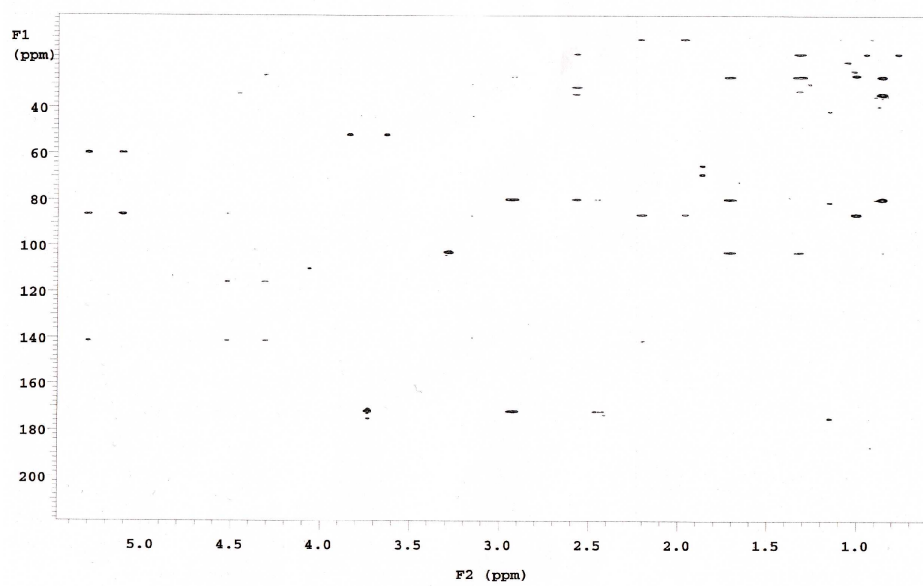

2D HMBC NMR spectrum ( $\text{CDCl}_3$ ) of manadoperoxide J (**12**)

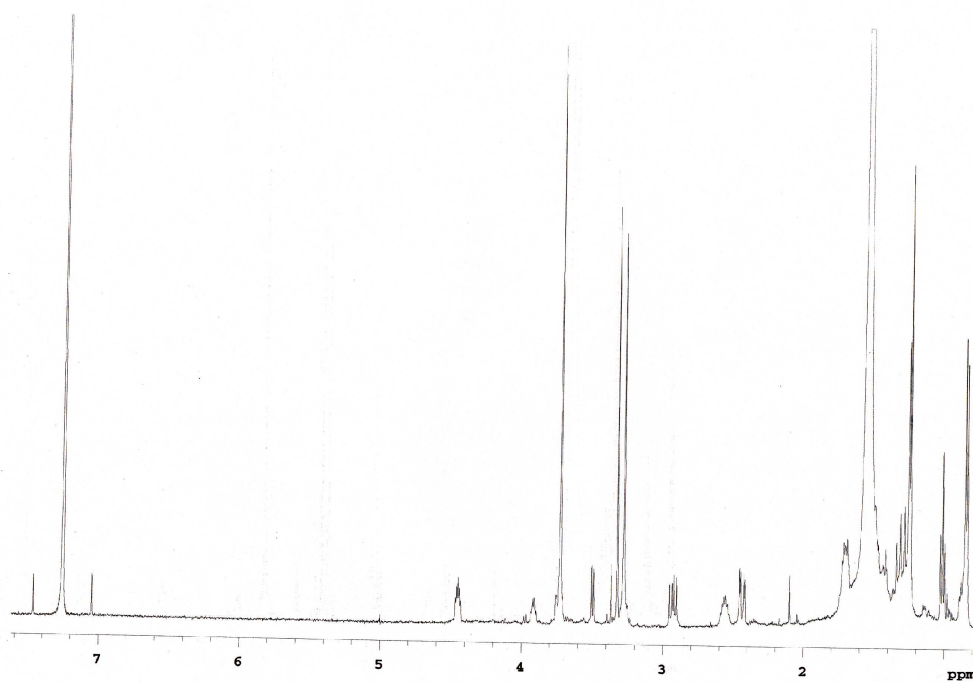

$^1\text{H}$  NMR spectrum ( $\text{CDCl}_3$ ) of manadoperoxide K (**13**)

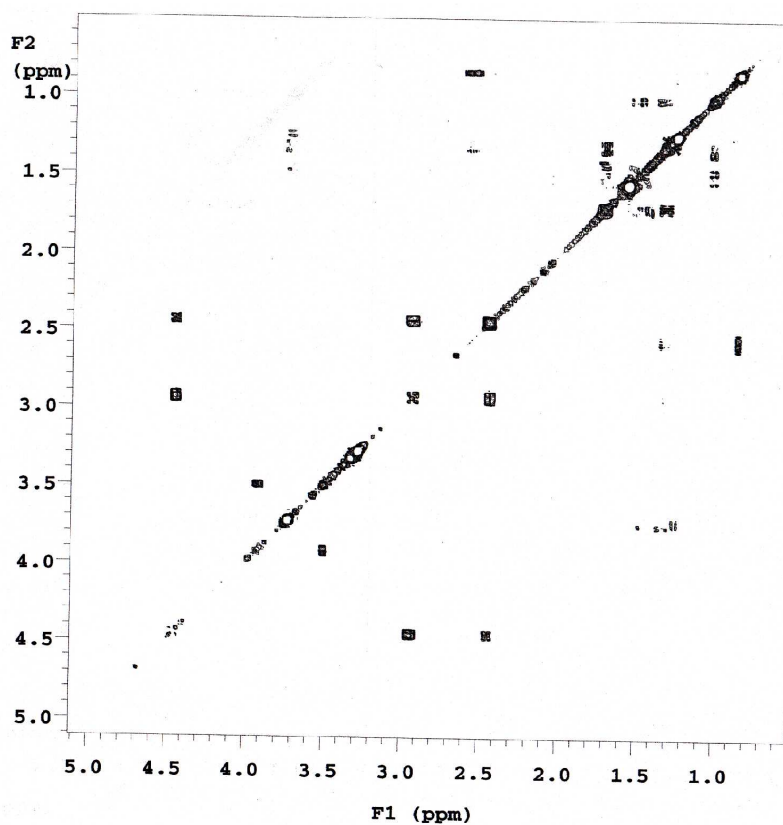

2D COSY NMR spectrum (CDCl<sub>3</sub>) of manadoperoxide K (**13**)

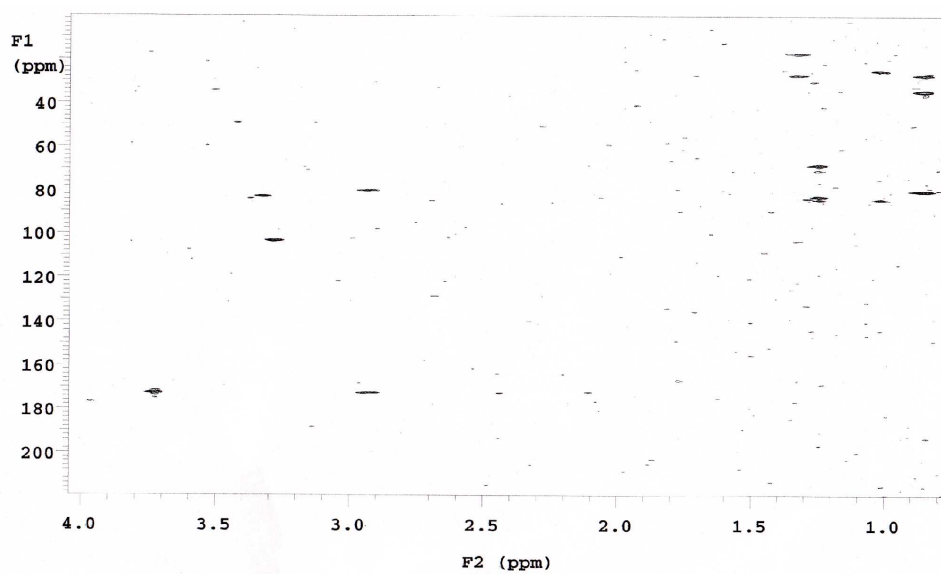

2D HMBC NMR spectrum (CDCl<sub>3</sub>) of manadoperoxide K (**13**)



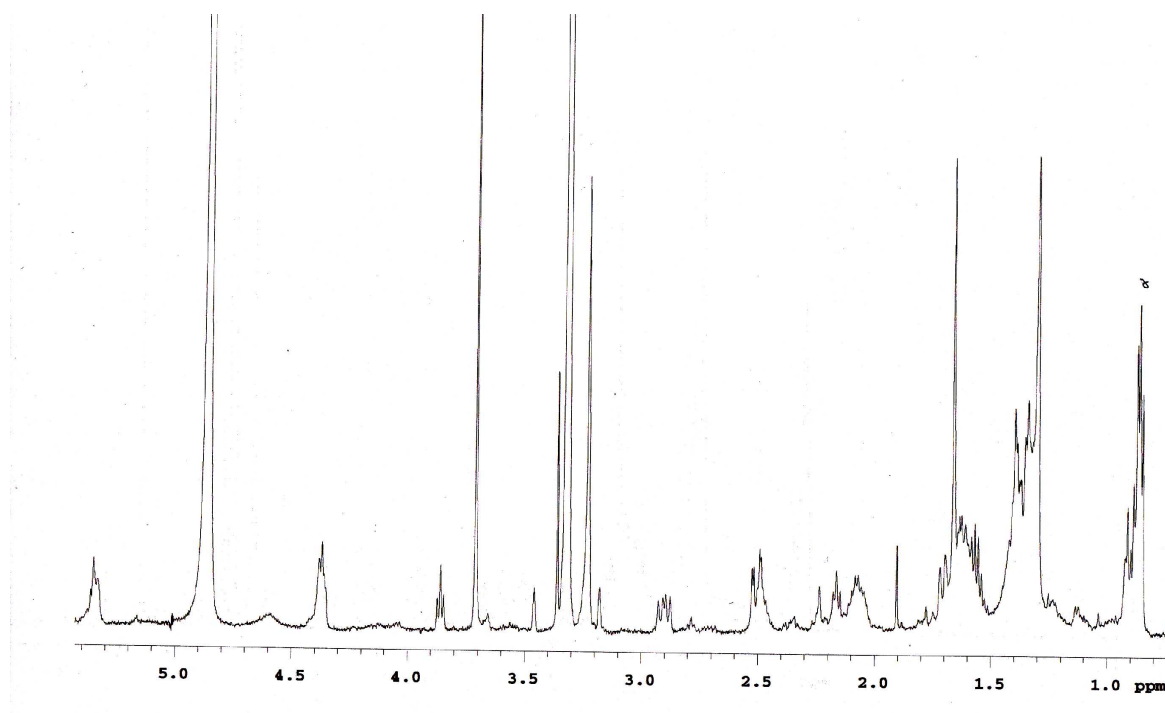

<sup>1</sup>H NMR spectrum (CD<sub>3</sub>OD) of manadoperoxide E (7)

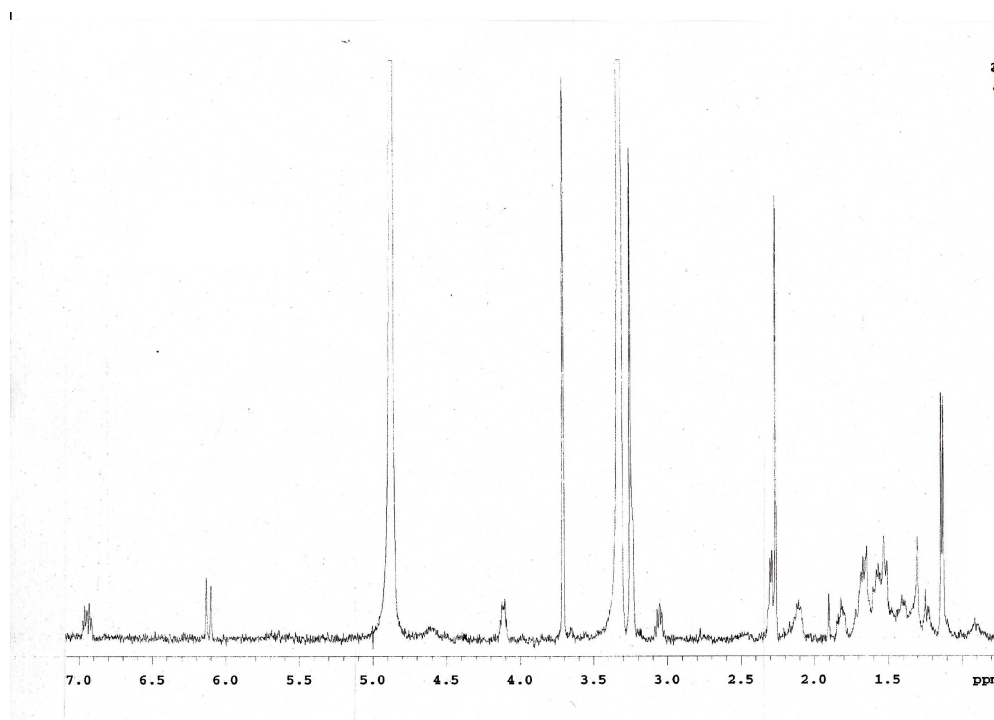

<sup>1</sup>H NMR spectrum (CD<sub>3</sub>OD) of peroxyplakoric ester C (14)

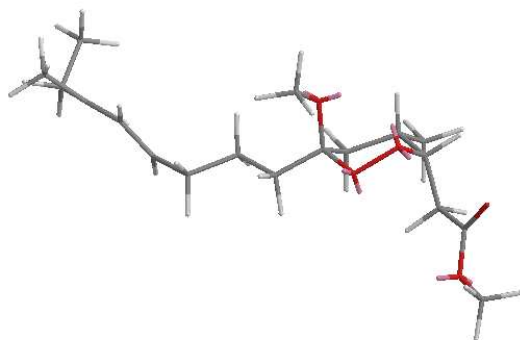

**Figure S1.** Lowest energy conformation of manadoperoxide B (**3**) calculated on SGI Origin 200 8XR12000. The conformational space was sampled through Simulated Annealing and the resulting structures minimized within Insight 2005 Discover module.
